# Supplementary material for: Differential Regulation of an OsIspH1, the Functional 4-Hydroxy-3-Methylbut-2-Enyl Diphosphate Reductase, for Photosynthetic Pigment Biosynthesis in Rice Leaves and Seeds
Source: Front Plant Sci. 2022 Apr 13;13:861036. doi: 10.3389/fpls.2022.861036 (PMC9044040; doi:10.3389/fpls.2022.861036)
Supplement: Supplementary file 1 [file Data_Sheet_1.xlsx]

## Sheet: Table S1
Table S1. Protein information of IspHs used in phylogenetic tree analysis of Fig. 1
Group	Protein ID	Species	Accession No.	Size (aa)
Bacteria	Ac AFZ57717.1	Anabaena cylindrica PCC 7122	AFZ57717.1	410
	Aa WP_010881128.1	Aquifex aeolicus VF5	WP_010881128.1	289
	Ec WP_137498636.1	Escherichia coli	WP_137498636.1	316
	Fm WP_102174231.1	Fischerella muscicola	WP_102174231.1	402
	Gv WP_011143289.1	Gloeobacter violaceus	WP_011143289.1	417
	Oc TAE75020.1	Oscillatoriales cyanobacterium	TAE75020.1	401
	PCC 7319 WP_026102341.1	Pleurocapsa sp. PCC 7319	WP_026102341.1	401
	Pm WP_063400887.1	Prochlorococcus marinus	WP_063400887.1	398
	Rc ADE87147.1	Rhodobacter capsulatus SB 1003	ADE87147.1	315
	Ss WP_194019647.1	Synechocystis salina	WP_194019647.1	406
Moss	Pp XP_024362949.1	Physcomitrium patens	XP_024362949.1	475
	Pp XP_024387277.1	Physcomitrium patens	XP_024387277.1	578
	Pp XP_024387278.1	Physcomitrium patens	XP_024387278.1	482
Ferm	Sm EFJ31647.1	Selaginella moellendorffii	EFJ31647.1	373
	Sm XP_002960319.1	Selaginella moellendorffii	XP_002960319.1	468
Gymnosperm	Gb ABB78088.1	Ginkgo biloba	ABB78088.1	487
	Gb ABB78089.1	Ginkgo biloba	ABB78089.1	482
	Gb ABB78090.1	Ginkgo biloba	ABB78090.1	474
	Ps ACN40284.1	Picea sitchensis	ACN40284.1	485
	Pt ABO26587.1	Pinus taeda	ABO26587.1	485
	Pt ABO26588.1	Pinus taeda	ABO26588.1	487
Angiosperm (Monocotyledon)	Bd XP_003560190.1	Brachypodium distachyon	XP_003560190.1	465
	Do AGH62555.1	Dendrobium officinale	AGH62555.1	460
	Eg XP_010909277.1	Elaeis guineensis	XP_010909277.1	462
	Hv KAE8815495.1	Hordeum vulgare	KAE8815495.1	464
	Ma XP_009393006.1	Musa acuminata	XP_009393006.1	457
	Ma XP_009412299.1	Musa acuminata	XP_009412299.1	455
	Ob XP_006650541.1	Oryza brachyantha	XP_006650541.1	459
	Om KAF0914347.1	Oryza meyeriana subsp. granulata	KAF0914347.1	497
	OsIspH1	Oryza sativa subsp. japonica	XP_015632597.1	459
	OsIspH2	Oryza sativa subsp. japonica	KAB8093431.1	482
	Pd XP_008790227.1	Phoenix dactylifera	XP_008790227.1	480
	Pd XP_008799160.1	Phoenix dactylifera	XP_008799160.1	466
	Sb XP_002463933.1	Sorghum bicolor	XP_002463933.1	464
	Ta KAF7044000.1	Triticum aestivum	KAF7044000.1	439
	Tt VAI02129.1	Triticum turgidum	VAI02129.1	464
	Zm NP_001169300.1	Zea mays	NP_001169300.1	462
Angiosperm (Dicotyledon)	At NP_567965.1	Arabidopsis thaliana	NP_567965.1	466
	Aa ADC84348.1	Artemisia annua	ADC84348.1	455
	Bv XP_010690939.1	Beta vulgaris	XP_010690939.1	466
	Bn XP_013651022.1	Brassica napus	XP_013651022.1	462
	Bn XP_013656186.1	Brassica napus	XP_013656186.1	461
	Bo XP_013600184.1	Brassica oleracea	XP_013600184.1	464
	Bo XP_013625057.1	Brassica oleracea	XP_013625057.1	461
	Br XP_009108739.1	Brassica rapa subsp. Rapa	XP_009108739.1	463
	Br XP_009113671.1	Brassica rapa subsp. Rapa	XP_009113671.1	462
	Cc XP_020216568.1	Cajanus cajan	XP_020216568.1	460
	Ca XP_016539712.1	Capsicum annuum	XP_016539712.1	462
	Cr ABI30631.1	Catharanthus roseus	ABI30631.1	462
	Cq XP_021731637.1	Chenopodium quinoa	XP_021731637.1	470
	Ca XP_004507401.1	Cicer arietinum	XP_004507401.1	448
	Cs XP_006479340.1	Citrus sinensis	XP_006479340.1	464
	Cs XP_006487206.1	Citrus sinensis	XP_006487206.1	492
	Ca XP_027105836.1	Coffea arabica	XP_027105836.1	464
	Cm XP_008454877.1	Cucumis melo	XP_008454877.1	463
	Cm XP_008459260.1	Cucumis melo	XP_008459260.1	466
	Cs XP_004137008.2	Cucumis sativus	XP_004137008.2	468
	Cs XP_004145400.1	Cucumis sativus	XP_004145400.1	465
	Dc XP_017258947.1	Daucus carota	XP_017258947.1	456
	Dc XP_017259005.1	Daucus carota	XP_017259005.1	449
	Fv XP_004289689.2	Fragaria vesca	XP_004289689.2	495
	Gm XP_003537898.1	Glycine max	XP_003537898.1	462
	Ha XP_022006535.1	Helianthus annuus	XP_022006535.1	449
	Ha XP_022016662.1	Helianthus annuus	XP_022016662.1	455
	Hb XP_021640965.1	Hevea brasiliensis	XP_021640965.1	462
	La AGQ04157.1	Lavandula angustifolia	AGQ04157.1	459
	Md XP_028957899.1	Malus domestica	XP_028957899.1	460
	Me XP_021595556.1	Manihot esculenta	XP_021595556.1	462
	Mp ASW22238.1	Mentha x piperita	ASW22238.1	462
	Nt AAD55762.2	Nicotiana tabacum	AAD55762.2	462
	Oe XP_022860427.1	Olea europaea	XP_022860427.1	461
	Pv XP_007131863.1	Phaseolus vulgaris	XP_007131863.1	462
	Pp XP_007199828.1	Prunus persica	XP_007199828.1	461
	Rc XP_002519102.1	Ricinus communis	XP_002519102.1	466
	Sm AGJ03149.1	Salvia miltiorrhiza f. alba	AGJ03149.1	463
	Sl NP_001234728.1	Solanum lycopersicum	NP_001234728.1	461
	St NP_001274899.1	Solanum tuberosum	NP_001274899.1	462
	Sr ABB88836.2	Stevia rebaudiana	ABB88836.2	458
	Vv XP_002284659.1	Vitis vinifera	XP_002284659.1	465

## Sheet: Table S2
Table S2. Protein information of IspHs used in multiple sequence alignment of Fig. 3
Group	Protein ID	Species	Accession No.	Size (aa)
Angiosperm (Monocotyledon)	Bd XP_003560190.1	Brachypodium distachyon	XP_003560190.1	465
	Do AGH62555.1	Dendrobium officinale	AGH62555.1	460
	Eg XP_010909277.1	Elaeis guineensis	XP_010909277.1	462
	Hv KAE8815495.1	Hordeum vulgare	KAE8815495.1	464
	Ma XP_009393006.1	Musa acuminata	XP_009393006.1	457
	Ma XP_009412299.1	Musa acuminata	XP_009412299.1	455
	OsIspH1	Oryza sativa	XP_015632597.1	459
	Pd XP_008790227.1	Phoenix dactylifera	XP_008790227.1	480
	Pd XP_008799160.1	Phoenix dactylifera	XP_008799160.1	466
	Sb XP_002463933.1	Sorghum bicolor	XP_002463933.1	464
	Tt VAI02129.1	Triticum turgidum	VAI02129.1	464
	Zm NP_001169300.1	Zea mays	NP_001169300.1	462

## Sheet: Table S3
Table S3. Transcript amounts to represent spatial and temporal expression of two rice IspH genes
		Seedling stage			Vegitative stage			Reproductive stage				Seed
Gene name		L	R		L	R		L	R	F		Se
OsIspH1		1.300±0.075	0.073±0.006		1.740±0.186	0.039±0.001		1.144±0.062	0.071±0.005	0.268±0.010		0.136±0.010
OsIspH2		0.002±0.000	0.052±0.004		0.003±0.000	0.019±0.001		0.004±0.000	0.034±0.003	0.001±0.000		0.014±0.002
All data are expressed as the mean values ± standard error from three technical replicates. The expression levels are presented as ΔCq values. L, leaves; R, roots; F, florets; Se, seeds harbested at 60 days after floweing.

## Sheet: Table S4
Table S4. Expression profiles of two rice IspH genes in ABA, CK, GA, IAA, MeJA, SA-treated rice seedlings
Gene name		Chemical		2^-ΔCt ± SE		Log2 ± SE
				0		0.5	1	2	4	6	(hpt)
OsIspH1		ABA		1.24±0.02		0.06±0.03	-0.34±0.02	-0.35±0.05	-0.05±0.02	0.10±0.02
		CK		0.89±0.04		0.44±0.00	0.16±0.02	-0.64±0.04	-0.33±0.01	0.05±0.02
		GA		0.79±0.02		0.70±0.02	0.32±0.03	-0.41±0.05	-0.41±0.02	0.19±0.02
		IAA		0.98±0.01		0.31±0.03	-0.08±0.02	-0.4±0.05	-0.39±0.03	0.12±0.02
		MeJA		0.87±0.05		0.45±0.01	0.52±0.03	-0.1±0.02	0.15±0.05	0.25±0.02
		SA		0.83±0.01		0.28±0.02	0.14±0.01	-0.29±0.04	-0.23±0.02	0.22±0.03
OsIspH2		ABA		0.00±0.00		0.00±0.00	0.00±0.00	0.00±0.00	0.00±0.00	0.00±0.00
		GA		0.00±0.00		-0.07±0.05	0.06±0.1	-0.1±0.05	0.08±0.07	0.20±0.11
		MeJA		0.00±0.00		0.00±0.00	0.00±0.00	0.00±0.00	0.00±0.00	0.00±0.00
All data are expressed as the mean values ± standard error from three technical replicates. The expression levels are presented as ΔCq values for 0 hour-post chemical treatment (hpt) and the Log 2 relative to it for other time-series samples. ABA, 100 μM absisic acid; CK, 100 μM kinetin; GA, 100 μM giberellic acid; IAA, 100 μM auxin; MeJA,100 μM methyl jasmonic acid; SA, 200 μM salicylic acid.

## Sheet: Table S5
Table S5. Transcript levels in leaves of rice plants
Plants	Line No.	OsIspH1MUT	OsIspH1	OsIspH1MUT+OsIspH1
Ilmi	NT	0.000±0.000	9.681±0.249	1.989±0.033
IspH1MUT	6	1.055±0.069	4.447±0.121	1.365±0.066
	12	1.158±0.099	5.529±0.22	1.461±0.095
	16	1.050±0.062	4.332±0.212	1.571±0.087
IspH1MUT-stPAC	1	0.932±0.106	7.420±1.192	1.811±0.285
	27	1.488±0.030	4.801±0.126	1.368±0.046
	28	0.605±0.022	5.676±0.201	1.28±0.0400
IspH1MUT	Average	1.088±0.063	4.769±0.122	1.465±0.069
IspH1MUT-stPAC	Average	1.008±0.050	5.966±0.390	1.486±0.088
All data are expressed as the mean values ± standard error from three technical replicates using leaves at 80 days after transplanting. Expression levels are presented as the 2-ΔΔCt value which are calculated by the ΔCt equation nomalized with the OsUbi5 as an internal control. Values are represented as the mean ± standard error of three independent measurements

## Sheet: Table S6
Table S6. Transcript levels in seeds of rice plants
Plants	Line No.	OsIspH1MUT	OsIspH1	OsIspH1MUT+OsIspH1	stPAC
Ilmi	NT	0.000±0.000	0.062±0.001	0.013±0.000	0.000±0.000
IspH1MUT	6	0.092±0.001	0.059±0.001	0.059±0.007
	12	0.121±0.004	0.077±0.001	0.077±0.001
	16	0.123±0.006	0.072±0.001	0.085±0.003
stPAC	25				0.237±0.003
IspH1MUT-stPAC	1	0.116±0.002	0.076±0.001	0.083±0.000	0.110±0.001
	27	0.315±0.005	0.087±0.001	0.184±0.003	0.409±0.006
	28	0.071±0.001	0.042±0.003	0.067±0.000	0.440±0.004
IspH1MUT	Average	0.112±0.005	0.069±0.002	0.074±0.004
IspH1MUT-stPAC	Average	0.167±0.035	0.068±0.006	0.111±0.017	0.320±0.050
All data are expressed as the mean values ± standard error from three technical replicates using mature seeds harvested at 60 days after flowering. Expression levels are presented as the 2-ΔΔCt value which are calculated by the ΔCt equation nomalized with the OsUbi5 as an internal control. Values are represented as the mean ± standard error of three independent measurements

## Sheet: Table S7
Table S7. Chlorophyll content and composition of rice leaves
Plants	Line No.	Chlorophyll a	Chlorophyll b	Total chlorophyll
Ilmi	NT	1.62±0.02	0.39±0.01	2.01±0.03
IspH1MUT	6	1.14±0.01	0.25±0.01	1.4±0.01
	12	1.56±0.01	0.37±0.01	1.94±0.01
	16	1.42±0.01	0.34±0.00	1.76±0.01
IspH1MUT	Average	1.38±0.06	0.32±0.02	1.7±0.07
All data are expressed as the mean values ± standard error from three independent experiments using the leaves of 10 days-old seedlings. The unit of chlorophyll content is μg/mg wet weighed leaves.

## Sheet: Table S8
Table S8. Carotenoid content and composition of rice leaves
Plants	Line No.	Carotenoid content (%)							Total carotenoid
		Lycopene	α-Carotene	β-Carotene	Lutein	β-Cryptoxanthin	Zeaxanthin	Violaxanthin
Ilmi	NT	N.D.	3.09±0.16 (1.4)	129.70±1.13 (58.0)	89.46±1.14 (40.0)	N.D.	1.30±1.11 (0.6)	N.D.	223.54±2.51
IspH1MUT	6	N.D.	2.49±0.10 (1.7)	85.49±2.38 (56.6)	61.47±1.19 (40.7)	N.D.	1.59±0.05 (1.1)	N.D.	151.04±3.60
	12	N.D.	2.65±0.09 (1.2)	129.81±2.05 (59.1)	85.96±1.19 (39.1)	N.D.	1.38±0.07 (0.6)	N.D.	219.79±3.04
	16	N.D.	2.41±0.21 (1.2)	114.07±0.94 (58.7)	76.37±0.74 (39.3)	N.D.	1.66±0.04 (0.9)	N.D.	194.50±1.64
IspH1MUT	Average	N.D.	2.52±0.03 (1.3)	109.79±6.11 (58.3)	74.60±5.82 (39.6)	N.D.	1.54±0.04 (0.8)	N.D.	188.45±9.46
All data are expressed as the mean values ± standard error from three independent experiments using the leaves of 10 days-old seedlings. The unit of chlorophyll content is μg/mg wet weighed leaves. ‘%’ is the ratio of each carotenoid composition to the total amounts of carotenoids.

## Sheet: Table S9
Table S9. Carotenoid content and composition of rice seeds
Plants	Line No.	Carotenoid content (%)							Total carotenoid
		Lycopene	α-Carotene	β-Carotene	Lutein	β-Cryptoxanthin	Zeaxanthin	Violaxanthin
Ilmi	NT	N.D.	N.D.	0.04±0.00 (18.9)	0.13±0.00 (65.6)	N.D.	0.03±0.00 (15.4)	N.D.	0.19±0.00
IspH1MUT	6	N.D.	N.D.	0.02±0.00 (22.0)	0.07±0.00 (66.2)	N.D.	0.01±0.00 (11.8)	N.D.	0.11±0.00
	12	N.D.	N.D.	0.02±0.00 (19.2)	0.09±0.00 (68.2)	N.D.	0.02±0.00 (12.6)	N.D.	0.13±0.00
	16	N.D.	N.D.	0.03±0.00 (23.9)	0.08±0.00 (62.1)	N.D.	0.02±0.00 (14.0)	N.D.	0.13±0.00
stPAC	25	0.03±0.01 (0.9)	0.08±0.00 (2.3)	2.51±0.20 (74.7)	0.56±0.01 (16.6)	N.D.	0.19±0.01 (5.5)	N.D.	3.36±0.01
IspH1MUT-stPAC	1	N.D.	0.07±0.00 (3.7)	1.25±0.03 (69.6)	0.39±0.01 (21.8)	N.D.	0.09±0.00 (5.0)	N.D.	1.79±0.03
	27	0.02±0.00 (0.7)	0.08±0.00 (2.9)	2.00±0.11 (72.0)	0.56±0.05 (20.1)	N.D.	0.12±0.01 (4.4)	N.D.	2.77±0.08
	28	N.D.	0.02±0.01 (2.4)	0.54±0.07 (59.1)	0.28±0.02 (30.3)	N.D.	0.07±0.02 (8.1)	N.D.	0.91±0.10
IspH1MUT	Average	N.D.	N.D.	0.03±0.00 (21.7)	0.08±0.00 (65.5)	N.D.	0.02±0.00 (12.9)	N.D.	0.12±0.00
IspH1MUT-stPAC	Average	0.01±0.00 (0.3)	0.06±0.00 (3.1)	1.26±0.20 (69.1)	0.41±0.04 (22.3)	N.D.	0.10±0.01 (5.2)	N.D.	1.82±0.25
All data are expressed as the mean values ± standard error from three independent experiments using mature seeds harvested at 60 days after flowering. The unit of carotenoid content is μg/g dry weight seeds. ‘%’ is the ratio of each carotenoid composition to the total amounts of carotenoids.

## Sheet: Table S10
Table S10. The primer list used in this study
Primers for vector construction		Sequences (forward/reverse)
OsIspH1	vF1	AAAAAGCAGGCTATATGCGCACCATCACCA
	vR1	AGAAAGCTGGGTATATTTACGCGGCCTGCA
attB	vGF	GGGGACAAGTTTGTACAAAAAAGCAGGCT
	vGR	GGGGACCACTTTGTACAAGAAAGCTGGGT
PGD1::Gene::PinII	vF2	TGGTACCTAGATATGCCGAACAT
	vR2	GCGAATTCGTCGATTCATAGAAGATTAG
OsIspH1:sGFP	vF3	AACAATGGCCCATATGGCGACCATCACCACGCAGCTCCGGTCGGCCCT
	vR3	TACAAGAAAGCTGGGTCATATGCGCGGCCTGCAAAACT
pMW118-OsIspH1	vF4	ACATGCATGCAAAGCAGGCTTCGAAGGAGATAATATGGCGACCATCACCACGCAGCTCCG
	vR4	TGATGGTACCAGAAAGCTGGTTACGCGGCCTGCAAAACTTCCTGGCGCTTGATCTCAAAC
pMW118-OsIspH1H145P	vF5	CAAGTTAAATCATGGCGAGCTTGTCGAG
	vR5	GCTCGCCATGATTTAACTTGTAGCTGATCTTGTTTCC
pMW118-OsIspH1K407R	vF6	CCAACGAGATCATCCACAACCCCACCGTCAACAAGCG
	vR6	GTTGTGGATGATCTCGTTGGTGAGCC
pMW118-OsIspH1H145P/K407R	vF7	GCAGGCTGGTACCAATGGCGACCATCACCACGCA
	vR7	AGAAAGCATGCTTACGCGGCCTGCAAAACTTCCTG
Primers for genomic DNA analysis		Sequences (forward/reverse)
gDNA PCR
PFG_1B-11039	gF1	CAGCCTTAGGTGCTTGGAAG
	gR2	CAAAATTCATCCCCATGGAG
pGA2707	gF2	ATGGCAGTGAATTAACATAGC
	gR2	AACGCTGATCAATTCCACAG
PGD1::OsIspH1H145P/K407R	gF3	GCAGGCTGGTACCAATGGCGACCATCACCACGCA
	gR3	AGAAGATGGACAAGTCTAGGGTCACATTGCAGGGT
stPAC	gF4	ATGAGCGTGGCTCTTCTCTGGG
	gR4	GGTCCTCGTCGAAGGCACAAG
TaqMan PCR
Bar	tBF	GCACGCAACGCCTACGA
	tBR	CACCAGCGGACGGGA
	tBP	CCGTGTACGTCTCCC
Primers for expression analysis		Sequences (forward/reverse)
Semi-quantitative RT-PCR
OsIspH1	rF1	GAAAATACTCCCATGAAGAAAC
	rR1	GGCGCCAGAAGTAACTCCGATTGT
Ubi5	sU5F	GTCCTCAGCCATGGAGC
	sU5R	GGACACAATGATTAGGG
qRT-PCR
OsIspH1	rF2	CTGATGGCTTGGTGAAGGTT
	rR2	CAGCACATGCCGTAGTATGC
OsIspH2	rF3	GCACAAGGAGACATGAGATGCTAGTATGG
	rR3	CCCAGATCACCAAATATGCACAAATAGTTC
OsIspH1H145P/K407R	rF9	AAGGCCCTATCACAATCGGAGTTACTTC
	rR7	AGAAGATGGACAAGTCTAGGGTCACATTGCAGGGT
stPAC	rF10	TGACGCACAGGATGTTCA
	rR8	GGTAGAGGTTGGTGATGGT
Ubi5	qU5F	GAAGTAAGGAAGGAGGAGGA
	qU5R	AAGGTGTTCAGTTCCAAGG
Primers for OsIspH2 cloning		Sequences (forward/reverse)
5'UTR-F	rF4	ATCAGCTCGTCGGCAAAGCGGCAGAT
Exon2-F	rF5	GATCAGCGAGATGGAGAGGAACGG
Exon3-F	rF6	AAATCATCCCGGTTGTTTCCGGTG
Exon4-F	rF7	GGCATATAAAGGGTAACTACACTACG
Exon7-F	rF8	AGTAAGTATGGTCTTGATCAGAACAACAAGC
Exon3-R	rR4	AATGACCACATCGCCATCTTCAAC
Exon4-R	rR5	GCGGTTGCAACAGTCTCTTCGTG
Exon8-R	rR6	ACAAGTATGAGGTCAACTTCCTTCTCTACCAATTTG
3'UTR-R	rR3	CCCAGATCACCAAATATGCACAAATAGTTC
